# Supplementary material for: Risk of Urogenital Bacterial Infection with Sodium-Glucose Cotransporter-2 Inhibitors: A Retrospective Cohort Study Using a Claims Database
Source: PubMed Central journal article supplement — Diabetes Ther. 2024 Jul 3;15(8):1821–30. doi: 10.1007/s13300-024-01613-7 (PMC11263449; doi:10.1007/s13300-024-01613-7), 2024-07-03
Supplement: 13300_2024_1613_MOESM1_ESM.pdf [file 13300_2024_1613_MOESM1_ESM.pdf]

## Supplementary Material

### **Risk of urogenital bacterial infection with sodium-glucose cotransporter-2 inhibitors: A retrospective cohort study using a claims database**

Takanori Imai,<sup>1</sup> Naoto Kato,<sup>1,2</sup> Naoki Kanda,<sup>1</sup> Hideki Hashimoto,<sup>1,3</sup> Hayato Yamana,<sup>4</sup>

Shuji Hatakeyama<sup>1,5\*</sup>

<sup>1</sup>Division of General Internal Medicine, Jichi Medical University Hospital, 3311-1

Yakushiji, Shimotsuke-shi, Tochigi 329-0498, Japan

<sup>2</sup>Yamagata Prefectural Central Hospital, 1800 Aoyagi, Yamagata-shi, Yamagata 990-

2292, Japan

<sup>3</sup>Department of Emergency and Critical Care Medicine, Hitachi General Hospital, 2-1-

1, Jonan-cho, Hitachi-shi, Ibaraki 317-0077, Japan

<sup>4</sup>Data Science Center, Jichi Medical University, 3311-1 Yakushiji, Shimotsuke-shi,

Tochigi 329-0498, Japan

<sup>5</sup>Division of Infectious Diseases, Department of Infection and Immunity, Jichi Medical

University, 3311-1 Yakushiji, Shimotsuke-shi, Tochigi 329-0498, Japan

\*Corresponding author

Shuji Hatakeyama, M.D., Ph.D.

Division of Infectious Diseases /Division of General Medicine, Jichi Medical

University

E-mail: [hatakeyamas@jichi.ac.jp](mailto:hatakeyamas@jichi.ac.jp)

**Supplementary Table S1.** Outcomes and procedural definitions

**Supplementary Table S2.** Covariates definitions

**Supplementary Table S3.** Additional baseline characteristics

**Supplementary Table S4.** Subgroup analyses of urinary tract infections

**Supplementary Table S5.** Subgroup analyses of genital bacterial infections

**Supplementary Table S6.** Subgroup analyses of perineal soft tissue infections

**Supplementary Table S1.** Outcomes and procedural definitions

| Outcome                                                               | Definitions                                                                                                               |
|-----------------------------------------------------------------------|---------------------------------------------------------------------------------------------------------------------------|
| <b>Perineal soft tissue infections</b>                                |                                                                                                                           |
| Necrotizing fasciitis                                                 | Japanese electronic claims codes: 8843235, 8846832, or 8848293 PLUS                                                       |
|                                                                       | Hospitalization PLUS                                                                                                      |
|                                                                       | Debridement or related surgical procedure                                                                                 |
| Cellulitis                                                            | Japanese electronic claims codes: 8830833, 8836798, or 8837993 PLUS                                                       |
|                                                                       | Any antibiotics (J01)                                                                                                     |
| Skin abscess                                                          | Japanese electronic claims codes: 6164003, 8836796, or 8837992 PLUS                                                       |
|                                                                       | Any antibiotics (J01)                                                                                                     |
| <b>Genital bacterial infections</b>                                   |                                                                                                                           |
| Orchitis, epididymitis                                                | Japanese electronic claims codes: 8831629, 8835905, 8835899, 8835920, 8845529, 6049013, 6049004, 8842191, or 8845610 PLUS |
|                                                                       | Any antibiotics (J01)                                                                                                     |
| Balanoposthitis, abscess or cellulitis of corpus cavernosum and penis | Japanese electronic claims codes: 6071004, 6071007, 6071014, 6072002, 6072004, 8831051, or 8831054 PLUS                   |
|                                                                       | Any antibiotics (J01)                                                                                                     |
| Vesiculitis, vasitis, scrotitis, scrotal abscess                      | Japanese electronic claims codes: 8835946, 6084008, 6084009, 8830679, 8830701, or 8836782 PLUS                            |
|                                                                       | Any antibiotics (J01)                                                                                                     |

|                                                                                                           |                                                                                                                                                                                                                   |
|-----------------------------------------------------------------------------------------------------------|-------------------------------------------------------------------------------------------------------------------------------------------------------------------------------------------------------------------|
| Prostatitis, prostatic abscess                                                                            | Japanese electronic claims codes: 8845528, 8845611, 8845609, 6011001, or 6012001 PLUS<br>Any antibiotics (J01)                                                                                                    |
| Salpingitis, oophoritis                                                                                   | Japanese electronic claims codes: 8832442, 8832459, 8832460, 6141001, 6141002, 8840408, 6141006, 6142004, 6142005, 6142021, 6142022, 6142027, 6142010, 6142015, 6142011, or 6142017 PLUS<br>Any antibiotics (J01) |
| Endometritis, metritis, myometritis, pyometra, uterine abscess, cervicitis, endocervicitis, exocervicitis | Japanese electronic claims codes: 6150002, 8847605, 6151003, 8847682, 6159007, 6159011, 6159016, 6160008, 8834208, or 8834210 PLUS<br>Any antibiotics (J01)                                                       |
| Bartholinitis, Bartholin's gland abscess                                                                  | Japanese electronic claims codes: 6163001, or 6168002 PLUS<br>Any antibiotics (J01)                                                                                                                               |
| Vaginitis, vulvitis, abscess of the vagina or vulva                                                       | Japanese electronic claims codes: 8832317, 8833940, 8837491, 8837524, 6161027, 8840322, 6164005, 6164008, or 6164009 PLUS<br>Any antibiotics (J01)                                                                |
| <b>Urinary tract infections</b>                                                                           |                                                                                                                                                                                                                   |
| Pyelonephritis, renal and perinephric abscess                                                             | Japanese electronic claims codes: 8846554, 5901002, 8846804, 8845884, 8840398, 8839400, 5900001, 8840395, 5908015, 5908007, 8838724, 5902005, 5902002, or 5909001 PLUS<br>Any antibiotics (J01)                   |
| Cystitis                                                                                                  | Japanese electronic claims codes: 5950003, 5950005, 5952002, 5952008, 5952005, 8843107, 5959003, 8848744, 8845026, 8848787, 8840131, 5959018, 5958007, 5959011, or 5959015 PLUS<br>Any antibiotics (J01)          |

Urethritis Japanese electronic claims codes: 8831091, 8841329, 8838542, 8838545, 8838549, 8840974, 8839297, 8839424, 5978008, 5978011, 5978015, 8838541, 8838544, 8840142, or 5978028 PLUS  
Any antibiotics (J01)

Urinary tract infection (site not specified) Japanese electronic claims codes: 389011, 8832418, 8842093, 8838561, 8839047, 5990009, or 8840382 PLUS  
Any antibiotics (J01)

---

**Procedures**

Debridement or related surgical procedures Japanese electronic claims codes: 150001570, 150001810, 150001910, 150002010, 150002210, 150002310, 150002410, 150342970, 150368370, 150423370, 150186510, 150187110, 150187210, 150245410, 150297510, 150325210, 150337810, 150337910, 150402470, 150402570, 150407210, 150407310, 150407410, 150420610, 150189810, 150202410, 150206410, 150206510, 150207310, 150207510, 150207910, 150208810, 150209510, 150212410, or 140012950

---

**Supplementary Table S2.** Covariates definitions

| Covariates                    | Definition                                                                                     |
|-------------------------------|------------------------------------------------------------------------------------------------|
| <b>Diabetic complications</b> | <b>ICD-10 codes</b>                                                                            |
| Nephropathy                   | E11.2, E14.2                                                                                   |
| Retinopathy                   | E11.3, E14.3                                                                                   |
| Neuropathy                    | E11.4, E14.4                                                                                   |
| Peripheral vascular disease   | E11.5, E14.5                                                                                   |
| <b>Comorbidities</b>          | <b>ICD-10 codes</b>                                                                            |
| Hypertension                  | I10-I15                                                                                        |
| Ischemic heart disease        | I20-I25                                                                                        |
| Heart failure                 | I50                                                                                            |
| Chronic kidney disease        | N18                                                                                            |
| Liver disease                 | K70-K77                                                                                        |
| Cerebrovascular disease       | I60-I69                                                                                        |
| Peripheral artery disease     | I70, I73, I74                                                                                  |
| COPD                          | J43                                                                                            |
| Autoimmune disease            | M05-M14, M30-M36                                                                               |
| Cancer                        | C00-C97                                                                                        |
| HIV infection                 | B20-B24                                                                                        |
| Urinary tract infection       | Japanese electronic claims codes: 389011, 8832418, 8842093, 8838561, 8839047, 5990009, 8840382 |

|                              |                             |
|------------------------------|-----------------------------|
| Neurogenic bladder           | N31                         |
| Spinal cord injury           | S14, S24, S34, T09.3, T91.3 |
| Intestinal tract infection   | A00-A09                     |
| Sexually transmitted disease | A50-A64                     |
| Asthma                       | J45                         |
| Atrial fibrillation          | I48                         |
| Psychiatric disease          | F20-F48, F50-F89            |
| Prostatic hypertrophy        | N40                         |
| Nephrolithiasis              | N20-N23                     |
| Trauma                       | S30-S99, T00-T07            |

| <b>Diabetic medications</b> | <b>ATC classification</b> |
|-----------------------------|---------------------------|
|-----------------------------|---------------------------|

|                                  |                           |
|----------------------------------|---------------------------|
| $\alpha$ -Glucosidase inhibitors | A10BF                     |
| Meglitinides                     | A10BX02, A10BX03, A10BX08 |
| Sulfonylureas                    | A10BB                     |
| Biguanides                       | A10BA                     |
| Thiazolidinediones               | A10BG                     |
| GLP-1 receptor agonists          | A10BJ                     |
| Insulin                          | A10A                      |

| <b>Comedications</b> | <b>ATC classification</b> |
|----------------------|---------------------------|
|----------------------|---------------------------|

|                      |       |
|----------------------|-------|
| Immunosuppressants   | L04A  |
| Oral corticosteroids | H02AB |



|                          |                                                                                           |
|--------------------------|-------------------------------------------------------------------------------------------|
| β-blockers               | C07A                                                                                      |
| Calcium channel blockers | C08C, C08D, C08E                                                                          |
| RAAS inhibitors          | C09A, C09C                                                                                |
| Antithrombotics          | B01AA, B01AB, B01AE, B01AF, B01AC04, B01AC05, B01AC06, B01AC22, B01AC23, B01AC24, B01AC25 |
| Antilipidemics           | C10A                                                                                      |
| Nitrates                 | C01D                                                                                      |
| Loop diuretics           | C03CA                                                                                     |
| Antibiotics              | J01                                                                                       |

| <b>Procedures</b>           | <b>Japanese electronic claims codes or ICD-10 codes</b>                                                                                                                                              |
|-----------------------------|------------------------------------------------------------------------------------------------------------------------------------------------------------------------------------------------------|
| Irregular outpatient visits | 112006470, 112006570, 112006670, 112006770, 111000570, 111000870, 111000110, 111015370, 111012510, 111014210, 111014310, 111015470, 111012710, 111013850, 111011810, 111012610, 111012810, 111014510 |
| Colonoscopy                 | D313                                                                                                                                                                                                 |
| PCI, CABG                   | K546-K552, Z95.1 (ICD-10), Z95.5 (ICD-10)                                                                                                                                                            |
| Urinary devices             | K783-2, K783-3, J06.3 (ICD-10), Z96.0 (ICD-10)                                                                                                                                                       |

Abbreviations: ICD-10, 10<sup>th</sup> edition of the International Classification of Diseases; ATC, Anatomical Therapeutic Chemical; COPD, chronic obstructive pulmonary disease; HIV, human immunodeficiency virus; GLP-1, glucagon-like peptide-1; RAAS, renin-angiotensin-aldosterone system; PCI, percutaneous coronary intervention; CABG, coronary artery bypass grafting.

**Supplementary Table S3.** Additional baseline characteristics

|                                      | Before propensity score matching |                                   |       | After propensity score matching  |                                  |       |
|--------------------------------------|----------------------------------|-----------------------------------|-------|----------------------------------|----------------------------------|-------|
|                                      | SGLT2 inhibitors<br>(n = 34,897) | DPP-4 inhibitors<br>(n = 135,311) | SMD   | SGLT2 inhibitors<br>(n = 31,659) | DPP-4 inhibitors<br>(n = 31,659) | SMD   |
| <b>Characteristics</b>               |                                  |                                   |       |                                  |                                  |       |
| Cohort entry                         |                                  |                                   |       |                                  |                                  |       |
| April 2014–March 2016                | 3399 (9.7)                       | 37989 (28.1)                      | 0.482 | 3105 (9.8)                       | 2933 (9.3)                       | 0.018 |
| April 2016–March 2018                | 10603 (30.4)                     | 49067 (36.3)                      | 0.125 | 9681 (30.6)                      | 9763 (30.8)                      | 0.006 |
| April 2018–February 2020             | 16202 (46.4)                     | 38926 (28.8)                      | 0.371 | 14722 (46.5)                     | 14864 (46.9)                     | 0.009 |
| <b>Diabetic complications</b>        |                                  |                                   |       |                                  |                                  |       |
| Peripheral vascular disease, n (%)   | 154 (0.4)                        | 458 (0.3)                         | 0.016 | 118 (0.4)                        | 120 (0.4)                        | 0.001 |
| <b>Comorbidities</b>                 |                                  |                                   |       |                                  |                                  |       |
| HIV infection, n (%)                 | 20 (0.1)                         | 72 (0.1)                          | 0.002 | 18 (0.1)                         | 12 (0.0)                         | 0.009 |
| Urinary tract infection, n (%)       | 933 (2.7)                        | 3923 (2.9)                        | 0.014 | 839 (2.6)                        | 875 (2.8)                        | 0.007 |
| Neurogenic bladder, n (%)            | 152 (0.4)                        | 964 (0.7)                         | 0.037 | 132 (0.4)                        | 128 (0.4)                        | 0.002 |
| Urinary devices, n (%)               | 208 (0.6)                        | 1168 (0.9)                        | 0.031 | 198 (0.6)                        | 209 (0.7)                        | 0.004 |
| Spinal cord injury, n (%)            | 26 (0.1)                         | 130 (0.1)                         | 0.007 | 23 (0.1)                         | 14 (0.0)                         | 0.012 |
| Intestinal tract infection, n (%)    | 1962 (5.6)                       | 6271 (4.6)                        | 0.045 | 1735 (5.5)                       | 1789 (5.6)                       | 0.007 |
| Sexually transmitted diseases, n (%) | 129 (0.4)                        | 357 (0.3)                         | 0.019 | 116 (0.4)                        | 112 (0.4)                        | 0.002 |
| Prostatic hypertrophy, n (%)         | 775 (2.2)                        | 4243 (3.1)                        | 0.057 | 714 (2.3)                        | 728 (2.3)                        | 0.003 |
| Nephrolithiasis, n (%)               | 799 (2.3)                        | 3207 (2.4)                        | 0.005 | 719 (2.3)                        | 701 (2.2)                        | 0.004 |
| <b>Comedications</b>                 |                                  |                                   |       |                                  |                                  |       |

|                                       |              |              |       |              |              |       |
|---------------------------------------|--------------|--------------|-------|--------------|--------------|-------|
| Nitrates, n (%)                       | 998 (2.9)    | 3651 (2.7)   | 0.010 | 895 (2.8)    | 875 (2.8)    | 0.004 |
| Loop diuretics, n (%)                 | 913 (2.6)    | 3465 (2.6)   | 0.003 | 781 (2.5)    | 723 (2.3)    | 0.012 |
| <b>Healthcare utilization</b>         |              |              |       |              |              |       |
| Hospitalizations, n (%)               | 2371 (6.8)   | 9155 (6.8)   | 0.001 | 2140 (6.8)   | 2085 (6.6)   | 0.007 |
| Irregular outpatient visits 0, n (%)  | 17996 (51.6) | 79734 (58.9) | 0.148 | 15998 (50.5) | 15751 (49.7) | 0.016 |
| Irregular outpatient visits 1, n (%)  | 7601 (21.8)  | 26944 (19.9) | 0.046 | 6998 (22.1)  | 7114 (22.5)  | 0.009 |
| Irregular outpatient visits >1, n (%) | 9300 (26.6)  | 28633 (21.2) | 0.129 | 8669 (27.4)  | 8800 (27.8)  | 0.009 |
| Colonoscopy, n (%)                    | 438 (1.3)    | 1744 (1.3)   | 0.003 | 405 (1.3)    | 421 (1.3)    | 0.004 |
| PCI or CABG, n (%)                    | 689 (2.0)    | 2350 (1.7)   | 0.018 | 609 (1.9)    | 613 (1.9)    | 0.001 |

Abbreviations: PS, propensity score; SMD, standardized mean difference; COPD, chronic obstructive pulmonary disease; HIV, human immunodeficiency virus; GLP-1, glucagon-like peptide-1; RAAS, renin-angiotensin-aldosterone system; PCI, percutaneous coronary intervention; CABG, coronary artery bypass grafting.

**Supplementary Table S4.** Subgroup analyses of urinary tract infections

|                         | Urinary tract infection |              |                 |              | HR (95% CI)      |
|-------------------------|-------------------------|--------------|-----------------|--------------|------------------|
|                         | Number of events        |              | Incidence rate† |              |                  |
|                         | SGLT2                   | DPP-4        | SGLT2           | DPP-4        |                  |
|                         | inhibitors              | inhibitors   | inhibitors      | inhibitors   |                  |
|                         | (n = 31,665)            | (n = 31,665) | (n = 31,665)    | (n = 31,665) |                  |
| Male                    | 463                     | 416          | 13.41           | 15.32        | 0.91 (0.79–1.04) |
| Female                  | 667                     | 622          | 50.93           | 58.36        | 0.91 (0.81–1.02) |
| Age                     |                         |              |                 |              |                  |
| <40 years               | 110                     | 75           | 25.37           | 26.17        | 1.05 (0.78–1.42) |
| 40–64 years             | 924                     | 850          | 22.92           | 26.39        | 0.90 (0.82–0.99) |
| ≥65 years               | 96                      | 113          | 32.44           | 41.23        | 0.79 (0.60–1.04) |
| Ischemic heart disease  |                         |              |                 |              |                  |
| yes                     | 101                     | 99           | 19.99           | 24.72        | 0.84 (0.64–1.11) |
| no                      | 1029                    | 939          | 24.18           | 27.77        | 0.91 (0.83–0.99) |
| Cerebrovascular disease |                         |              |                 |              |                  |
| yes                     | 78                      | 87           | 20.69           | 31.64        | 0.69 (0.50–0.93) |
| no                      | 1052                    | 951          | 23.99           | 27.12        | 0.92 (0.84–1.01) |
| Biguanides              |                         |              |                 |              |                  |
| yes                     | 455                     | 375          | 23.96           | 28.21        | 0.90 (0.79–1.04) |
| no                      | 675                     | 663          | 23.58           | 27.03        | 0.90 (0.81–1.00) |
| Insulin                 |                         |              |                 |              |                  |
| yes                     | 148                     | 103          | 28.34           | 30.39        | 1.01 (0.79–1.31) |
| no                      | 982                     | 935          | 23.16           | 27.15        | 0.88 (0.81–0.97) |
| Sulfonylureas           |                         |              |                 |              |                  |
| yes                     | 126                     | 115          | 24.16           | 30.5         | 0.86 (0.66–1.10) |
| no                      | 1004                    | 923          | 23.68           | 27.11        | 0.91 (0.83–0.99) |

Abbreviations: SGLT2, sodium glucose cotransporter 2; DPP-4, dipeptidyl peptidase-4; HR, hazard ratio; CI, confidence interval.

† Per 1000 person-years of follow-up.

**Supplementary Table S5.** Subgroup analyses of genital bacterial infections

|                         | Genital bacterial infection |                            |                            |                            | HR (95% CI)      |
|-------------------------|-----------------------------|----------------------------|----------------------------|----------------------------|------------------|
|                         | Number of events            |                            | Incidence rate†            |                            |                  |
|                         | SGLT2                       | DPP-4                      | SGLT2                      | DPP-4                      |                  |
|                         | inhibitors<br>(n = 31,665)  | inhibitors<br>(n = 31,665) | inhibitors<br>(n = 31,665) | inhibitors<br>(n = 31,665) |                  |
| Male                    | 246                         | 141                        | 7.07                       | 5.13                       | 1.43 (1.16–1.76) |
| Female                  | 75                          | 75                         | 5.39                       | 6.62                       | 0.84 (0.61–1.16) |
| Age                     |                             |                            |                            |                            |                  |
| <40 years               | 53                          | 30                         | 12.05                      | 10.35                      | 1.23 (0.78–1.93) |
| 40–64 years             | 249                         | 167                        | 6.04                       | 5.05                       | 1.24 (1.02–1.51) |
| ≥65 years               | 19                          | 19                         | 6.22                       | 6.63                       | 0.93 (0.49–1.77) |
| Ischemic heart disease  |                             |                            |                            |                            |                  |
| yes                     | 43                          | 17                         | 8.40                       | 4.15                       | 2.08 (1.19–3.65) |
| no                      | 278                         | 199                        | 6.38                       | 5.73                       | 1.15 (0.96–1.39) |
| Cerebrovascular disease |                             |                            |                            |                            |                  |
| yes                     | 17                          | 10                         | 4.41                       | 3.54                       | 1.27 (0.58–2.78) |
| no                      | 304                         | 206                        | 6.78                       | 5.72                       | 1.23 (1.03–1.47) |
| Biguanides              |                             |                            |                            |                            |                  |
| yes                     | 125                         | 63                         | 6.43                       | 4.61                       | 1.46 (1.08–1.98) |
| no                      | 196                         | 153                        | 6.70                       | 6.08                       | 1.13 (0.91–1.40) |
| Insulin                 |                             |                            |                            |                            |                  |
| yes                     | 33                          | 17                         | 6.12                       | 4.86                       | 1.32 (0.73–2.37) |
| no                      | 288                         | 199                        | 6.65                       | 5.63                       | 1.22 (1.02–1.46) |
| Sulfonylureas           |                             |                            |                            |                            |                  |
| yes                     | 28                          | 16                         | 5.22                       | 4.12                       | 1.32 (0.71–2.44) |
| no                      | 293                         | 200                        | 6.76                       | 5.72                       | 1.22 (1.02–1.46) |

Abbreviations: SGLT2, sodium glucose cotransporter 2; DPP-4, dipeptidyl peptidase-4; HR, hazard ratio; CI, confidence interval.

† Per 1000 person-years of follow-up.

**Supplementary Table S6.** Subgroup analyses of perineal soft tissue infections

|                         | Perineal soft tissue infection |                            |                            |                            | HR (95% CI)       |
|-------------------------|--------------------------------|----------------------------|----------------------------|----------------------------|-------------------|
|                         | Number of events               |                            | Incidence rate†            |                            |                   |
|                         | SGLT2                          | DPP-4                      | SGLT2                      | DPP-4                      |                   |
|                         | inhibitors<br>(n = 31,665)     | inhibitors<br>(n = 31,665) | inhibitors<br>(n = 31,665) | inhibitors<br>(n = 31,665) |                   |
| Male                    | 24                             | 20                         | 0.68                       | 0.72                       | 0.97 (0.53–1.75)  |
| Female                  | 6                              | 3                          | 0.43                       | 0.26                       | 1.6 (0.40–6.51)   |
| Age                     |                                |                            |                            |                            |                   |
| <40 years               | 2                              | 4                          | 0.45                       | 1.37                       | 0.32 (0.06–1.77)  |
| 40–64 years             | 26                             | 18                         | 0.63                       | 0.54                       | 1.17 (0.64–2.14)  |
| ≥65 years               | 2                              | 1                          | 0.65                       | 0.34                       | 1.86 (0.17–20.53) |
| Ischemic heart disease  |                                |                            |                            |                            |                   |
| yes                     | 6                              | 1                          | 1.16                       | 0.24                       | 3.92 (0.47–32.57) |
| no                      | 24                             | 22                         | 0.55                       | 0.63                       | 0.91 (0.51–1.62)  |
| Cerebrovascular disease |                                |                            |                            |                            |                   |
| yes                     | 2                              | 3                          | 0.52                       | 1.06                       | 0.60 (0.10–3.60)  |
| no                      | 28                             | 20                         | 0.62                       | 0.55                       | 1.12 (0.63–1.99)  |
| Biguanides              |                                |                            |                            |                            |                   |
| yes                     | 10                             | 8                          | 0.51                       | 0.58                       | 0.88 (0.35–2.26)  |
| no                      | 20                             | 15                         | 0.68                       | 0.59                       | 1.16 (0.59–2.27)  |
| Insulin                 |                                |                            |                            |                            |                   |
| yes                     | 3                              | 8                          | 0.55                       | 2.28                       | 0.28 (0.07–1.06)  |
| no                      | 27                             | 15                         | 0.62                       | 0.42                       | 1.46 (0.78–2.75)  |
| Sulfonylureas           |                                |                            |                            |                            |                   |
| yes                     | 2                              | 5                          | 0.37                       | 1.28                       | 0.33 (0.06–1.71)  |
| no                      | 28                             | 18                         | 0.64                       | 0.52                       | 1.26 (0.69–2.28)  |

Abbreviations: SGLT2, sodium glucose cotransporter 2; DPP-4, dipeptidyl peptidase-4; HR, hazard ratio; CI, confidence interval.

† Per 1000 person-years of follow-up.
